# Supplementary material for: Preservation media, durations and cell concentrations of short-term storage affect key features of human adipose-derived mesenchymal stem cells for therapeutic application
Source: PeerJ. 2017 May 17;5:e3301. doi: 10.7717/peerj.3301 (PMC5437859; doi:10.7717/peerj.3301)
Supplement: Data S1 [file peerj-05-3301-s002.xlsx]

## Sheet: Figure 1
	Unstored	ME+HSA	NS+HSA	Glucose	GM
	98.64	96.52	92.98	64.29	90.08
Cell Viability	99.3	95.14	92.7	63.98	91.09
	99.48	95.97	90.2	75.16	76.25
	3.4	2.85	2.63	3.81	26.01
Cell Cluster Rate	7.67	3.12	3	3.79	25.84
	8.51	4.36	7.06	3.86	29.11
	14.8	15.6	2.8	14.4	20.8
CFU/100cells	18	11.6	3.2	12	20.4
	24	12.8	1.2	14.4	21.2
	Unstored			ME+HSA			NS+HSA			Glucose			GM
Normal Cell	78.8	86.8	69.8	59.7	35.2	55.1	64.2	48.5	39.1	75.2	46.9	40	44.9	56.2	53.6
Early Stage Apoptotic Cell	14.9	6.72	24.7	17.5	28.5	39.2	16.4	24.1	25.6	13.9	6.58	47.7	28.6	30.5	30.1
Late Stage Apoptotic Cell	6.18	6.43	5.51	22.8	36.3	5.65	19.4	27.3	34.6	13.3	46.5	12.3	26.5	13.1	16.2

## Sheet: Figure 2
	Unstored			24h			48h
	Mean	SD	N	Mean	SD	N	Mean	SD	N
CFU/100cells	20.267	2.309	3	15.2	3.51	3	8.667	1.665	3
	Unstored			24h			48h
Normal Cell	59.7	57.1	56.2	53.1	46.4	52.3	37.8	36.3	36.9
Early Stage Apoptotic Cell	40	42.5	43.4	20.6	23.5	15.3	21.6	20.9	21.4
Late Stage Apoptotic Cell	0.287	0.374	0.413	25.6	29.9	31.9	40.4	42.7	41.5

## Sheet: Figure 3
	Unstored	1×106cells/ml	5×106cells/ml	10×106cells/ml
	20	13.2	11.6	16
CFU/100cells	21.6	21.2	14.4	14
	24	16.8	13	16.4
	Unstored			1×106cells/ml			5×106cells/ml			10×106cells/ml
Normal Cell	59.7	57.1	56.2	53.1	46.4	52.3	47	43.8	37.6	34.3	36.4	36
Early Stage Apoptotic Cell	40	42.5	43.4	20.6	23.5	15.3	31.8	32.3	27.1	23.1	19.8	27.1
Late Stage Apoptotic Cell	0.287	0.374	0.413	25.6	29.9	31.9	20.8	23.5	34.8	42.1	43.4	36.3

## Sheet: Figure 4
	Day	Unstored			1×106cells/ml			5×106cells/ml			10×106cells/ml
	1	515.236	655.241	705.102	51.637	53.232	27.526	267.77	308.205	282.894	324.625	296.473	211.834
	2	1387.04	1255.01	1258.59	273.736	152.452	206.381	710.166	741.767	683.305	734.164	728.61	545.633
	3	2390.55	2586.04	2489.72	267.305	202.922	194.738	714.875	706.401	740.845	653.242	924.178	698.383
	4	2794.58	2643.3	2818.34	179.414	190.671	176.075	825.806	933.566	741.988	783.374	925.976	737.504
Fluorescence Value	5	2908.67	2983.08	2600.87	724.832	543.262	528.738	2145.45	2227.18	2080.7	1821.56	2285.3	1849.67
	6	3365.52	3392.15	3253.53	923.949	499.975	525.997	2510.98	2884.71	2891.37	2260.18	2888.48	2431.23
	7	3490.31	3523.95	3600.09	2250.37	1379	1410.86	3233.09	3195.84	3269.74	2921.93	3268.62	3597.83
	8	3390.52	3570.94	3341.44	2265.68	1591.93	1386.39	3160.78	3222.99	3245.59	2975.64	3176.32	3391.11
	9	2754.12	2907.8	2636.41	2302.23	3185.42	2434.29	3328.54	3314.85	3455.89	3217.57	3296.28	3189.98
	10	3201.89	2831.06	2440.17	2718	3175.3	2734.59	3207.85	3184.02	3177.81	3172.92	3194	3119.5

## Sheet: Figure 5
	Unstored	1×106cells/ml	5×106cells/ml	10×106cells/ml
	0.130941	0.0650347	0.10153	0.0793172
Osteogenesis Absorbance	0.125418	0.0572424	0.0932268	0.0727137
	0.144536	0.0823802	0.0736859	0.065216
	Unstored	1×106cells/ml	5×106cells/ml	10×106cells/ml
	0.347124	0.153983	0.363748	0.151087
Adipogenesis Absorbance	0.379285	0.184907	0.300305	0.168676
	0.363204	0.198655	0.352183	0.148385

## Sheet: Figure 6
		Unstored			5×106cells/ml
	G0/G1	78	77.43	74.18	77.68	76.18	78.67
Cell Cycle	S	11.9	13.11	13.03	8.53	8.11	5.63
	G2/M	6.59	7.62	6.49	9.79	10.53	10.6
	Unstored	5×106cells/ml
	3510.15	2694.56
IDO1	3672.03	3496.39
	3781.03	3989.66
	Unstored	5×106cells/ml
	26.5038	29.9718
Kyn Concentration(μM)	23.2427	25.4279
	25.9606	26.9527

## Sheet: Supplemental Figure S1
	Unstored	24h	48h
	99.55	99.64	97.84
Cell Viability	99.22	97.4	89.9
	99.69	97.28	98.28
	Unstored	24h	48h
	16.25	14.29	7.44
Cell Cluster Rate	14.66	14.29	7.14
	17.43	16.61	9.36
